## Correction: Human MicroRNA Targets

Bino John, Anton J. Enright, Alexei Aravin, Thomas Tuschl, Chris Sander, Debora S. Marks

DOI: 10.1371/journal.pbio.0020363

In *PLoS Biology*, volume 2, issue 11:

We incorrectly named the products of two genes, gamma actin and betaAPP, as FMRP ligands because of a misreading of Table 1 from [1]. BetaAPP is incorrectly referred to as an FMRP ligand in Tables 2 and S9, gamma actin in Table S9 only. This does not change the use of FMRP binding as a way to support the target predictions, as the statistics remain virtually the same; the enrichment of FMRP targets within the predicted microRNA target set changes from 5.31 to 5.26 as a result of our misclassification. In addition, it does not change the fact that betaAPP is a predicted microRNA target. Our Web site at <http://www.microrna.org/> contains the updated information with changes flagged. We thank Dr. Denman for pointing out this error to us.

### Reference

1. Denman RB (2003) Deja vu all over again: FMRP binds U-rich target mRNAs. *Biochem Biophys Res Commun* 310: 1–7.

This correction note may be found online at DOI: 10.1371/journal.pbio.0030264.

Published July 12, 2005

Citation: (2005) Correction: Human microRNA targets. *PLoS Biol* 3(7): e264.
